# Supplementary material for: An Electrochemical Aptasensor Integrating Zeolitic Imidazolate Framework for Highly Selective Detection of Bioaerosols
Source: Biosensors (Basel). 2022 Sep 4;12(9):725. doi: 10.3390/bios12090725 (PMC9496278; doi:10.3390/bios12090725)
Supplement: Supplementary file 1 [file biosensors-12-00725-s001.zip › biosensors-1877236-supplementary.pdf]

# Supporting Information

## Section 1: Supplementary Figures

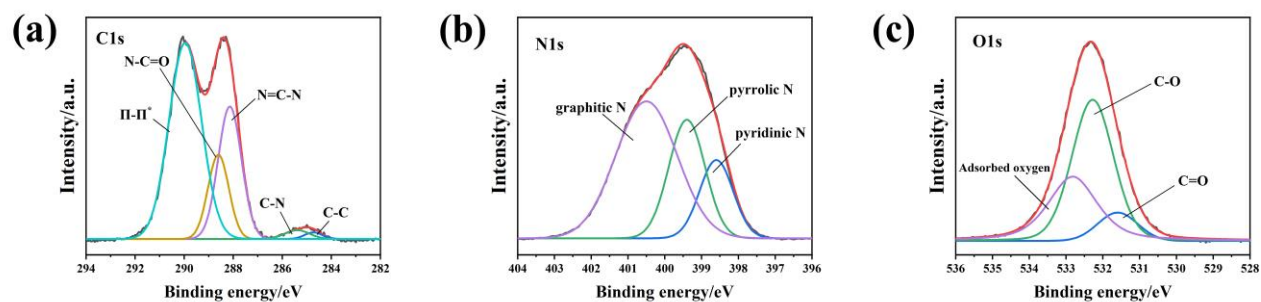

Figure S1. C1s, N1s and O1s XPS spectra of MCA.

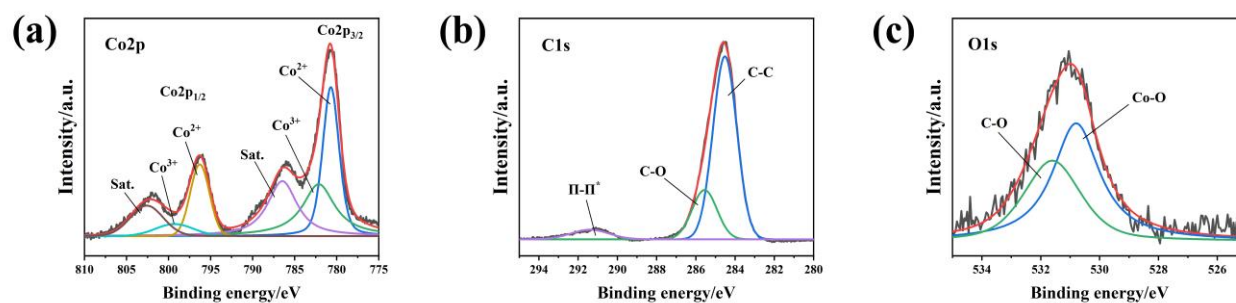

Figure S2. Co2p, C1s and O1s XPS spectra of ZIF-67.

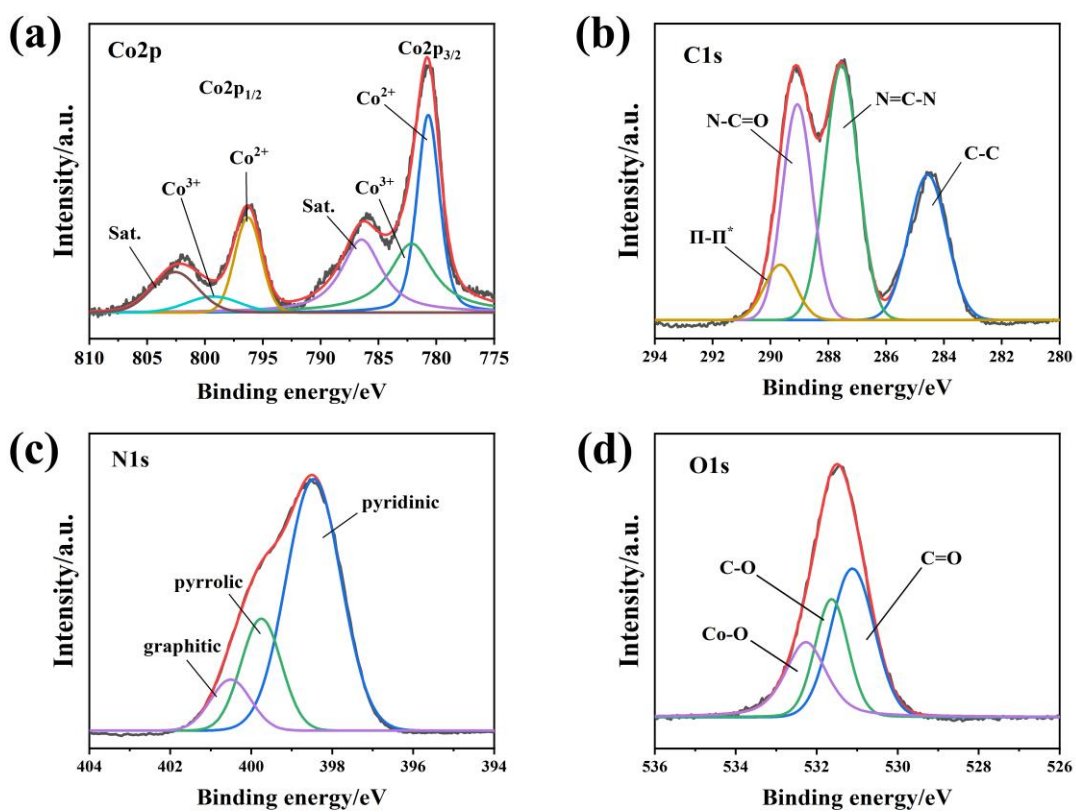

Figure S3. Co2p, C1s, N1s and O1s XPS spectra of ZM-2.

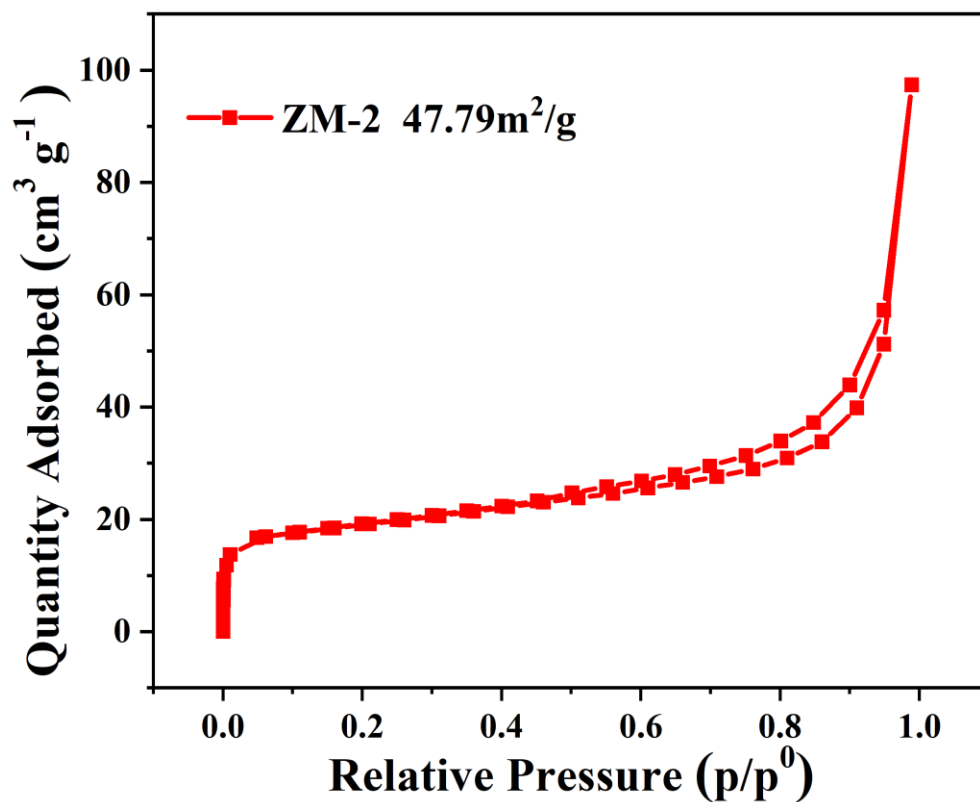

**Figure S4.** Nitrogen adsorption-desorption isotherms of ZM-2.

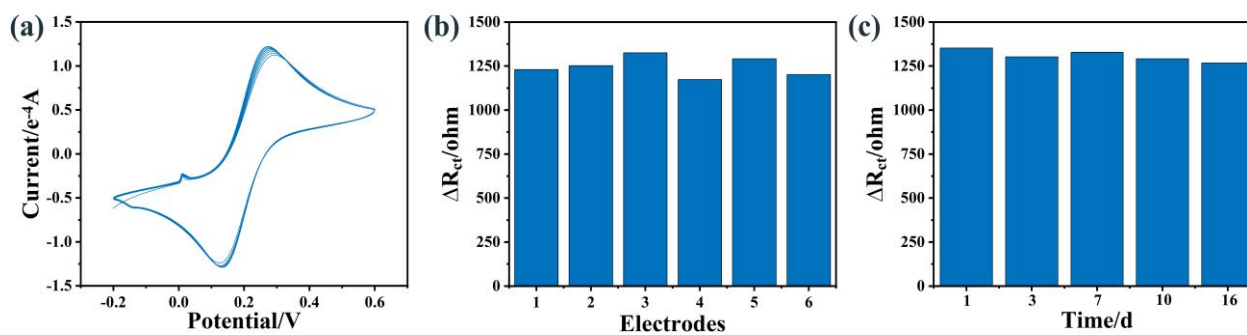

**Figure S5.** (a) The repeatability, (b) reproducibility, and (c) stability of the ZM-2-based aptasensor for detection of 100 nM ATP.

**(a)**

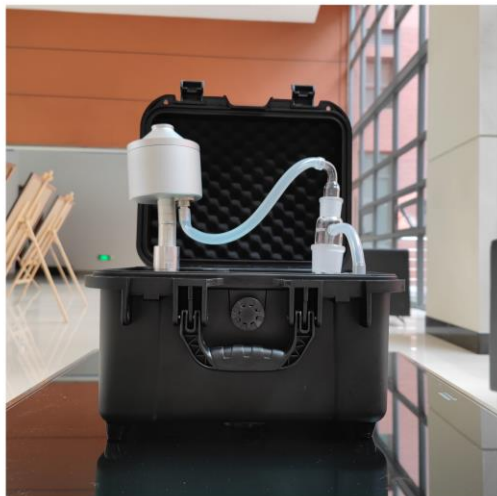

**(b)**

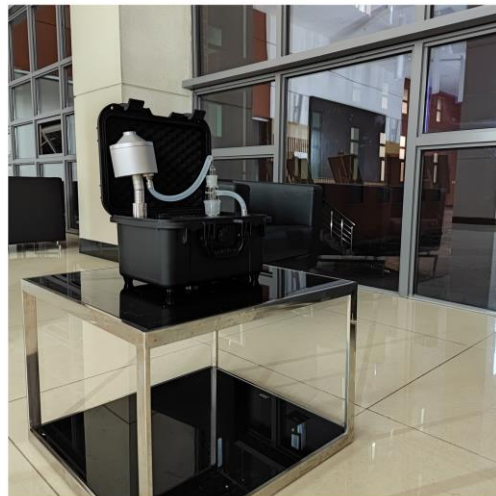

**(c)**

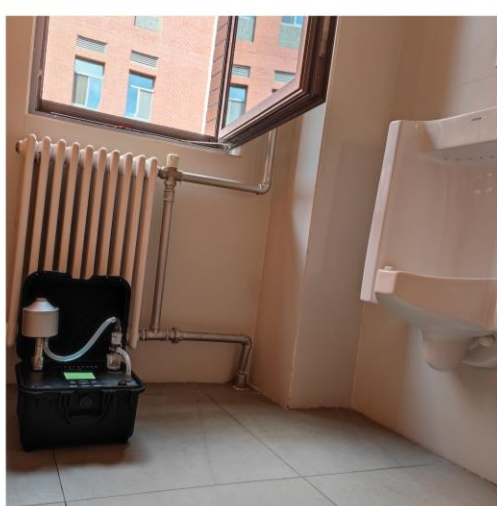

**(d)**

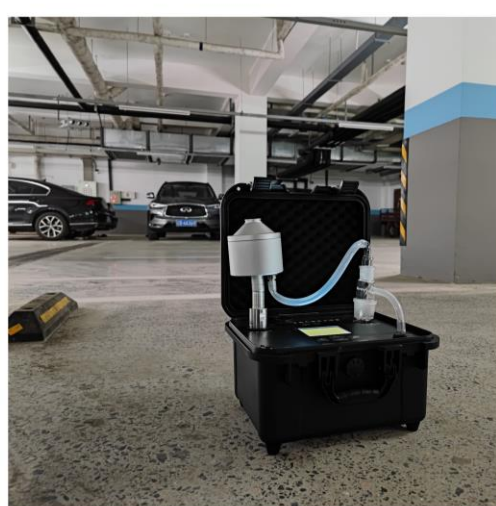

**Figure S6.** Digital images of bioaerosol collecting from different places or time. (a) Hall (day); (b) Hall (night); (c) Toilet; (d) Garage.

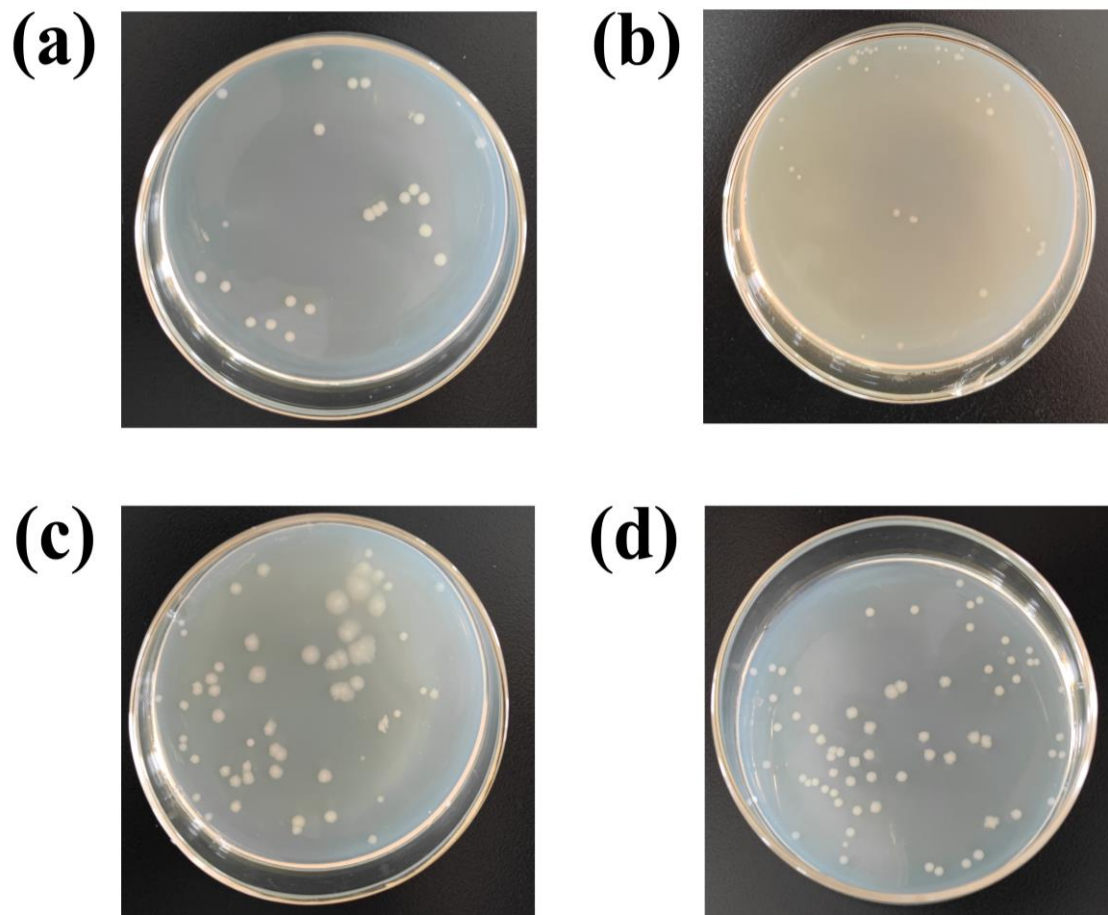

**Figure S7.** Digital images of bacterial bioaerosol culture plates collected from different places or time. (a) Hall (day); (b) Hall (night); (c) Toilet; (d) Garage.

## Section 2: Supplementary Table

**Supplementary Table S1.** Summary of the oligonucleotides used for aptasensor design.

| DNA oligonucleotide | Sequence (5'-3')                | Note                                 |
|---------------------|---------------------------------|--------------------------------------|
|                     | ACCTGGGGGAGT                    |                                      |
| Apt                 | ATTGCGGAGGAAGGT                 | Original sequence of ATP DNA aptamer |
| FApt                | ACCTGGGGGAGTATTGCGGAGGAAGGT-FAM | FAM tagged part of ATP DNA aptamer   |
| MApt                | ACCTAAAAAAGTATTGCAAAAAAAGGT     | Mutation sequence of ATP DNA aptamer |

**Supplementary Table S2.** Various detection methods for ATP in some reported works.

| Detection method      | Detection range     | LOD      | Ref       |
|-----------------------|---------------------|----------|-----------|
| EC/MOF                | 100 nm–1000 $\mu$ M | 3.9 nM   | [37]      |
| RLS/aptasensor        | 2.5–75 nM           | 0.046 nM | [38]      |
| ECL/QDs               | 8–2000 nM           | 7.6 nM   | [39]      |
| CD/aptasensor         | 1.5–4.2 mM          | 0.2 mM   | [40]      |
| FL/GO                 | 0.5–250 $\mu$ M     | 100 nM   | [41]      |
| EC/exonuclease        | 0.1–20 nM           | 34 pM    | [42]      |
| ZIF-67-MCA/aptasensor | 0.1–100 nM          | 0.11 nM  | this work |
